# Supplementary material for: Unusual solidification and phosphate binding to benzimidazole cations in the presence of water
Source: Royal Society of Chemistry journal article supplement (doi:10.1039/c2nj20897k), 2012-01-01
Supplement: c2nj20897k.pdf [file c2nj20897k.pdf]

## Unusual solidification and phosphate binding to benzimidazole cations in the presence of water

Sarah E. Clifford<sup>a</sup>, Marcin Runowski<sup>a</sup>, Nalini Parthasarathy<sup>a</sup>, Céline Besnard<sup>b</sup>, Xavier Melich<sup>a</sup> and Alan F. Williams<sup>\*a</sup>

### Supplementary material

Table S1 pK<sub>a</sub> values in 1:1 water : ethanol mixtures at 22°C

Table S2. Stability constants β<sub>abc</sub> for complexes (PO<sub>4</sub>)<sub>a</sub>L<sub>b</sub>(H)<sub>c</sub> in 1:1 water : ethanol mixtures at 22°C

Table S3. Stability constants β<sub>abc</sub> for complexes (AsO<sub>4</sub>)<sub>a</sub>L<sub>b</sub>(H)<sub>c</sub> in 1:1 water : ethanol mixtures at 22°C

Table S4 pK<sub>a</sub> values for 1-ω-diamines in 1:1 water : methanol mixtures at 22°C and 0.5 M ionic strength.

Table S5. Stability constants β<sub>abc</sub> for complexes (PO<sub>4</sub>)<sub>a</sub>L<sub>b</sub>(H)<sub>c</sub> in 1:1 water : ethanol mixtures at 22°C

Figure S1 Ortep drawing of [4]2(H<sub>2</sub>PO<sub>4</sub>), ellipsoids at 50%

Table S6 Selected geometric parameters (Å, °) for [4]2(H<sub>2</sub>PO<sub>4</sub>)

Table S7. Data for hydrogen bonds [4]2(H<sub>2</sub>PO<sub>4</sub>)

Figure S2 Ortep drawing of [2]SO<sub>4</sub>.3H<sub>2</sub>O, ellipsoids at 50%

Table S8. Selected geometric parameters (Å, °) for [2]SO<sub>4</sub>.3H<sub>2</sub>O

Table S9. Data for hydrogen bonds for [2]SO<sub>4</sub>.3H<sub>2</sub>O

Figure S3 Ortep drawing of (4)<sub>2</sub>(H<sub>2</sub>PO<sub>4</sub>)<sub>2</sub>(HPO<sub>4</sub>).4H<sub>2</sub>O, ellipsoids at 50%

Table S10 Geometric parameters (Å, °) for (4)<sub>2</sub>(H<sub>2</sub>PO<sub>4</sub>)<sub>2</sub>(HPO<sub>4</sub>).4H<sub>2</sub>O

Table S11 Hydrogen-bond geometry (Å, °) for (4)<sub>2</sub>(H<sub>2</sub>PO<sub>4</sub>)<sub>2</sub>(HPO<sub>4</sub>).4H<sub>2</sub>O

Table S1 pK<sub>a</sub> values in 1:1 water : ethanol mixtures at 22°C

|                                                                   | pK <sub>a1</sub>  | pK <sub>a2</sub>  | pK <sub>a3</sub>  |
|-------------------------------------------------------------------|-------------------|-------------------|-------------------|
| <b>2</b>                                                          | 4.46(3)           | 6.20(1)           |                   |
| <b>3</b>                                                          | 4.82(2)           | 6.48(1)           |                   |
| (1,4)-bis( <i>N</i> -methyl-benzimidazol-2-onium)butane, <b>6</b> | 5.04(3)           | 6.48(1)           |                   |
| <b>4</b>                                                          | 4.96(4)           | 6.32(2)           |                   |
| <b>5</b>                                                          | 5.45(6)           | 6.68(4)           |                   |
| N-methyl imidazolium                                              | 6.07(1)           |                   |                   |
| H <sub>3</sub> PO <sub>4</sub>                                    | 3.27(16)          | 8.58(16)          | 13.53(15)         |
| H <sub>3</sub> AsO <sub>4</sub>                                   | 3.59 <sup>a</sup> | 8.45 <sup>a</sup> | 13.0 <sup>a</sup> |
| H <sub>2</sub> SO <sub>4</sub>                                    | -3 (fixed)        | 3.47 <sup>a</sup> |                   |

<sup>a</sup> Values taken from Martell, A.E., Smith, R.M. NIST Critically Selected Stability Constants of Metal Complexes, Database 46, Version 6.0, NIST Standard Referenced Data, 2001.

Table S2. Stability constants β<sub>abc</sub> for complexes (PO<sub>4</sub>)<sub>a</sub>L<sub>b</sub>(H)<sub>c</sub> in 1:1 water : ethanol mixtures at 22°C

| Cation LH <sub>2</sub> <sup>2+</sup> | β <sub>216</sub> | β <sub>215</sub> | β <sub>214</sub> | β <sub>213</sub> |
|--------------------------------------|------------------|------------------|------------------|------------------|
| <b>2</b>                             | 60.40(6)         | 55.62(7)         | 49.34(5)         | 40.64(6)         |
| <b>3</b>                             | 61.67(3)         | 56.65(4)         | 50.25(2)         | 41.42(3)         |
| <b>4</b>                             | 61.01(3)         | 55.95(4)         | 49.68(3)         | 40.68(3)         |
| <b>5</b>                             | 61.63(5)         | 56.33(7)         | 49.57(4)         | 40.79(4)         |

Table S3. Stability constants β<sub>abc</sub> for complexes (AsO<sub>4</sub>)<sub>a</sub>L<sub>b</sub>(H)<sub>c</sub> in 1:1 water : ethanol mixtures at 22°C

| Cation   | β <sub>216</sub>            | β <sub>215</sub>            | β <sub>214</sub>            | β <sub>213</sub>            |
|----------|-----------------------------|-----------------------------|-----------------------------|-----------------------------|
| <b>2</b> | β <sub>216</sub> = 58.89(2) | β <sub>213</sub> = 39.42(3) | β <sub>212</sub> = 30.38(3) | β <sub>211</sub> = 17.72(4) |
| <b>3</b> | β <sub>216</sub> = 60.18(3) | β <sub>213</sub> = 39.71(8) | β <sub>212</sub> = 31.08(4) | β <sub>211</sub> = 18.77(6) |
| <b>4</b> | β <sub>114</sub> = 35.42(2) | β <sub>111</sub> = 39.71(8) |                             |                             |
| <b>5</b> | β <sub>216</sub> = 58.89(2) | β <sub>213</sub> = 39.42(3) |                             |                             |

Table S4 pK<sub>a</sub> values for 1-ω-diamines in 1:1 water : methanol mixtures at 22°C and 0.5 M ionic strength.

| Diamine            | pK <sub>a1</sub> | pK <sub>a2</sub> |
|--------------------|------------------|------------------|
| 1,2-diaminoethane  | 7.46(3)          | 10.58(2)         |
| 1,3-diaminopropane | 9.29(3)          | 11.16(2)         |
| 1,4-diaminobutane  | 10.15(5)         | 11.66(3)         |
| 1,5-diaminopentane | 10.42(10)        | 11.70(8)         |

Table S5. Stability constants β<sub>abc</sub> for complexes (PO<sub>4</sub>)<sub>a</sub>L<sub>b</sub>(H)<sub>c</sub> in 1:1 water : ethanol mixtures at 22°C

| L                  | β <sub>216</sub> | β <sub>215</sub> | β <sub>214</sub> | β <sub>213</sub> | β <sub>212</sub> | β <sub>211</sub> |
|--------------------|------------------|------------------|------------------|------------------|------------------|------------------|
| 1,2-diaminoethane  |                  |                  | 48.53(9)         | 40.23(4)         | 29.64(1)         | 18.73(5)         |
| 1,3-diaminopropane |                  | 59.05(3)         | 50.38(3)         | 39.3(3)          | 28.0(6)          | 16.94(17)        |
| 1,4-diaminobutane  |                  | 60.81(5)         | 52.05(5)         | 41.04(8)         | 29.80(6)         | 17.0(3)          |
| 1,5-diaminopentane | 70.51(1)         | 63.28(2)         | 55.45(2)         | 46.87(3)         | 35.81(5)         | 24.01(5)         |

Figure S1 Ortep drawing of  $[4]2(\text{H}_2\text{PO}_4)$ , ellipsoids at 50%

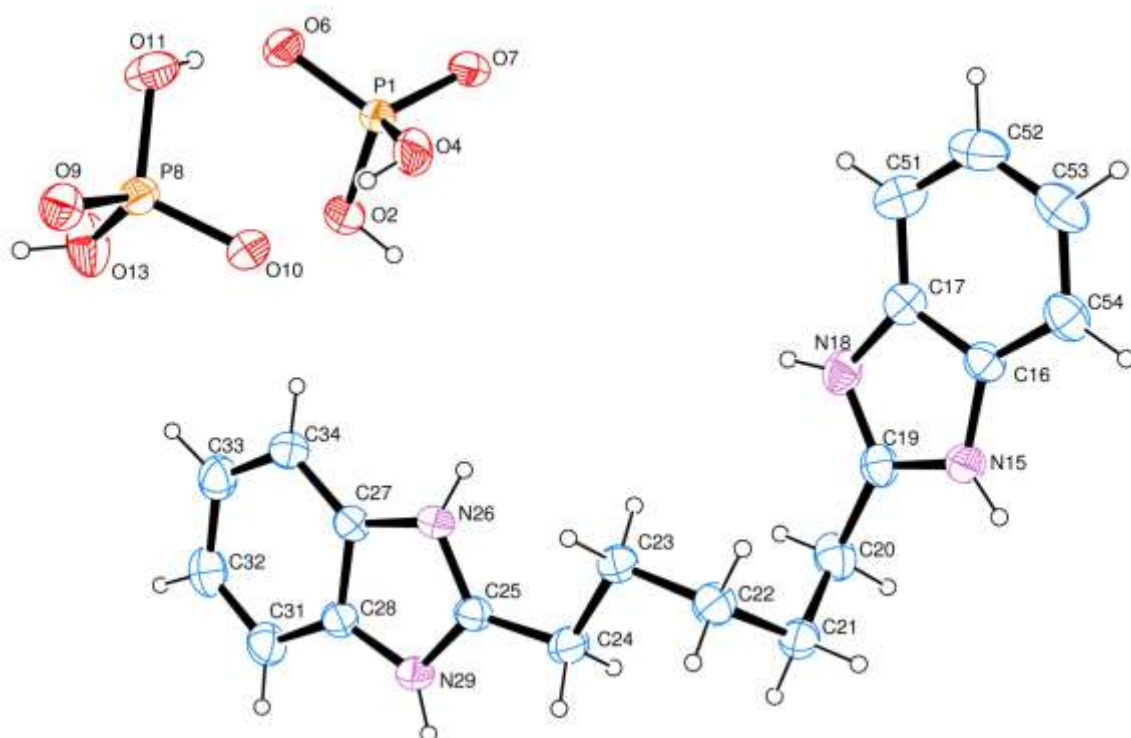

Table S6 Selected geometric parameters ( $\text{\AA}$ ,  $^\circ$ ) for  $[4]2(\text{H}_2\text{PO}_4)$

|             |        |      |             |        |      |
|-------------|--------|------|-------------|--------|------|
| P1—O2       | 1.5721 | (11) | C21—C22     | 1.515  | (2)  |
| P1—O4       | 1.5715 | (12) | C22—C23     | 1.527  | (2)  |
| P1—O6       | 1.5080 | (10) | C23—C24     | 1.523  | (2)  |
| P1—O7       | 1.5028 | (11) | C24—C25     | 1.486  | (2)  |
| P8—O9       | 1.5055 | (11) | C25—N26     | 1.3331 | (17) |
| P8—O10      | 1.5015 | (10) | C25—N29     | 1.3380 | (17) |
| P8—O11      | 1.5680 | (12) | N26—C27     | 1.3885 | (18) |
| P8—O13      | 1.5671 | (12) | C27—C28     | 1.3910 | (19) |
| N15—C16     | 1.3873 | (18) | C27—C34     | 1.390  | (2)  |
| N15—C19     | 1.3312 | (18) | C28—N29     | 1.3849 | (19) |
| C16—C17     | 1.388  | (2)  | C28—C31     | 1.390  | (2)  |
| C16—C54     | 1.390  | (2)  | C31—C32     | 1.378  | (2)  |
| C17—N18     | 1.3890 | (19) | C32—C33     | 1.397  | (2)  |
| C17—C51     | 1.388  | (2)  | C33—C34     | 1.378  | (2)  |
| N18—C19     | 1.3300 | (19) | C51—C52     | 1.381  | (3)  |
| C19—C20     | 1.490  | (2)  | C52—C53     | 1.395  | (3)  |
| C20—C21     | 1.532  | (2)  | C53—C54     | 1.383  | (2)  |
| O2—P1—O4    | 107.09 | (6)  | C20—C21—C22 | 114.24 | (13) |
| O2—P1—O6    | 106.65 | (6)  | C21—C22—C23 | 115.95 | (13) |
| O4—P1—O6    | 109.86 | (6)  | C22—C23—C24 | 111.93 | (12) |
| O2—P1—O7    | 111.04 | (6)  | C23—C24—C25 | 114.08 | (12) |
| O4—P1—O7    | 106.65 | (7)  | C24—C25—N26 | 126.40 | (12) |
| O6—P1—O7    | 115.30 | (6)  | C24—C25—N29 | 124.59 | (12) |
| O9—P8—O10   | 114.98 | (6)  | N26—C25—N29 | 108.99 | (12) |
| O9—P8—O11   | 106.27 | (6)  | C25—N26—C27 | 109.04 | (11) |
| O10—P8—O11  | 110.70 | (6)  | N26—C27—C28 | 106.45 | (12) |
| O9—P8—O13   | 111.18 | (6)  | N26—C27—C34 | 131.81 | (13) |
| O10—P8—O13  | 106.16 | (7)  | C28—C27—C34 | 121.73 | (14) |
| O11—P8—O13  | 107.37 | (7)  | C27—C28—N29 | 106.36 | (12) |
| C16—N15—C19 | 108.90 | (12) | C27—C28—C31 | 121.62 | (14) |

|             |        |      |             |        |      |
|-------------|--------|------|-------------|--------|------|
| N15—C16—C17 | 106.52 | (12) | N29—C28—C31 | 132.00 | (14) |
| N15—C16—C54 | 131.38 | (14) | C28—N29—C25 | 109.12 | (12) |
| C17—C16—C54 | 122.10 | (14) | C28—C31—C32 | 116.62 | (15) |
| C16—C17—N18 | 106.22 | (13) | C31—C32—C33 | 121.60 | (15) |
| C16—C17—C51 | 121.63 | (15) | C32—C33—C34 | 122.09 | (15) |
| N18—C17—C51 | 132.15 | (15) | C27—C34—C33 | 116.30 | (15) |
| C17—N18—C19 | 109.04 | (12) | C17—C51—C52 | 116.41 | (16) |
| N15—C19—N18 | 109.32 | (13) | C51—C52—C53 | 121.92 | (16) |
| N15—C19—C20 | 125.33 | (14) | C52—C53—C54 | 121.83 | (16) |
| N18—C19—C20 | 125.35 | (14) | C16—C54—C53 | 116.11 | (16) |
| C19—C20—C21 | 113.28 | (13) |             |        |      |

Table S7. Data for hydrogen bonds [4]2(H<sub>2</sub>PO<sub>4</sub>)

| Donor, D | Hydrogen, H | Acceptor, A | D-H, Å    | H...A, Å  | D...A, Å   | Angle D-H-A (°) | Equivalent position for A |
|----------|-------------|-------------|-----------|-----------|------------|-----------------|---------------------------|
| O2       | H21         | O7          | 0.85(2)   | 1.77(2)   | 2.6246(16) | 176(2)          | 1-x,-y,1-z                |
| O4       | H41         | O10         | 0.76(2)   | 1.85(2)   | 2.6072(17) | 176.8(18)       |                           |
| O11      | H111        | O6          | 0.779(19) | 1.837(19) | 2.6125(16) | 173(2)          |                           |
| O13      | H131        | O9          | 0.85(3)   | 1.70(3)   | 2.5416(18) | 176.3(18)       | 2-x,1-y,2-z               |
| N15      | H151        | O9          | 0.879(19) | 1.819(19) | 2.6766(18) | 165(2)          | 1-x,1-y,1-z               |
| N18      | H181        | O6          | 0.85(2)   | 1.83(2)   | 2.669(2)   | 171.8(19)       | 1-x,-y,1-z                |
| N26      | H261        | O7          | 0.84(2)   | 1.866(19) | 2.6716(18) | 160.5(19)       | 1-x,-y,1-z                |
| N29      | H291        | O10         | 0.87(2)   | 1.88(2)   | 2.7152(18) | 162(2)          | 2-x,1-y,1-z               |
| C21      | H211        | O9          | 0.99(2)   | 2.58(2)   | 3.531(2)   | 161.2(15)       | x,y,-1+z                  |

Figure S2 Ortep drawing of [2]SO<sub>4</sub>·3H<sub>2</sub>O, ellipsoids at 50%

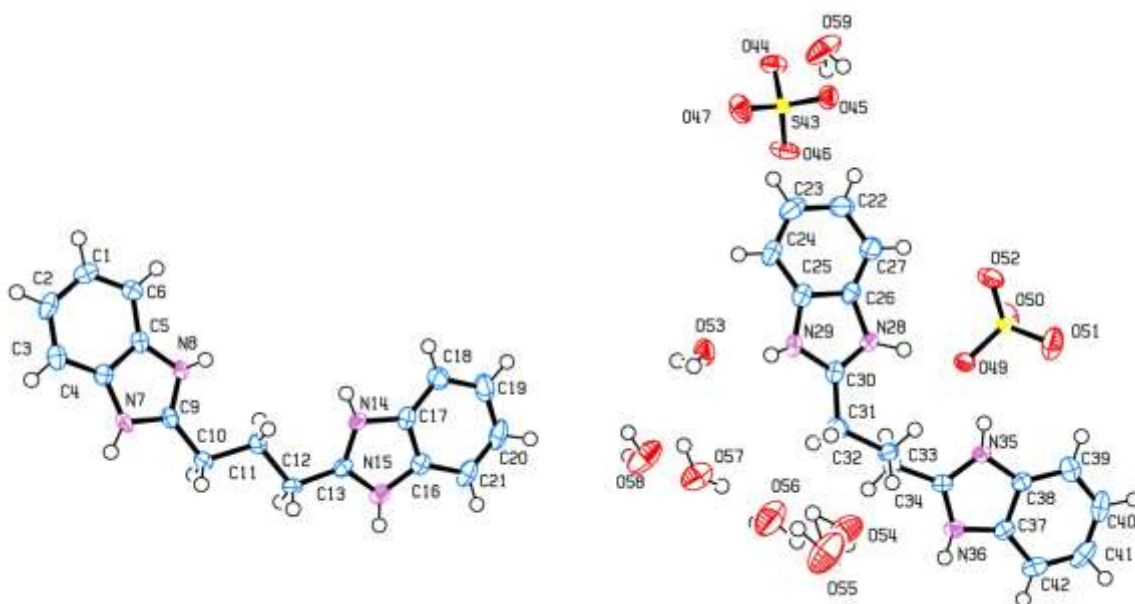

Table S8. Selected geometric parameters (Å, °) for [2]SO<sub>4</sub>·3H<sub>2</sub>O

|             |        |      |             |        |      |
|-------------|--------|------|-------------|--------|------|
| C1—C2       | 1.404  | (4)  | C25—C26     | 1.394  | (3)  |
| C1—C6       | 1.379  | (3)  | C25—N29     | 1.380  | (3)  |
| C2—C3       | 1.376  | (4)  | C26—C27     | 1.375  | (4)  |
| C3—C4       | 1.399  | (3)  | C26—N28     | 1.407  | (3)  |
| C4—C5       | 1.390  | (3)  | N28—C30     | 1.318  | (3)  |
| C4—N7       | 1.391  | (3)  | N29—C30     | 1.340  | (3)  |
| C5—C6       | 1.398  | (3)  | C30—C31     | 1.497  | (3)  |
| C5—N8       | 1.378  | (3)  | C31—C32     | 1.531  | (3)  |
| N7—C9       | 1.323  | (3)  | C32—C33     | 1.531  | (3)  |
| N8—C9       | 1.334  | (3)  | C33—C34     | 1.494  | (3)  |
| C9—C10      | 1.492  | (3)  | C34—N35     | 1.328  | (3)  |
| C10—C11     | 1.525  | (3)  | C34—N36     | 1.325  | (3)  |
| C11—C12     | 1.525  | (3)  | N35—C38     | 1.380  | (3)  |
| C12—C13     | 1.486  | (3)  | N36—C37     | 1.394  | (3)  |
| C13—N14     | 1.331  | (3)  | C37—C38     | 1.400  | (3)  |
| C13—N15     | 1.332  | (3)  | C37—C42     | 1.389  | (3)  |
| N14—C17     | 1.390  | (3)  | C38—C39     | 1.385  | (3)  |
| N15—C16     | 1.397  | (3)  | C39—C40     | 1.377  | (4)  |
| C16—C17     | 1.378  | (3)  | C40—C41     | 1.394  | (4)  |
| C16—C21     | 1.397  | (3)  | C41—C42     | 1.385  | (4)  |
| C17—C18     | 1.402  | (3)  | S43—O44     | 1.4929 | (17) |
| C18—C19     | 1.376  | (3)  | S43—O45     | 1.4800 | (17) |
| C19—C20     | 1.409  | (4)  | S43—O46     | 1.4650 | (18) |
| C20—C21     | 1.371  | (4)  | S43—O47     | 1.4661 | (17) |
| C22—C23     | 1.404  | (4)  | S48—O49     | 1.4925 | (16) |
| C22—C27     | 1.380  | (3)  | S48—O50     | 1.4639 | (17) |
| C23—C24     | 1.375  | (4)  | S48—O51     | 1.4642 | (17) |
| C24—C25     | 1.397  | (3)  | S48—O52     | 1.4655 | (18) |
| C2—C1—C6    | 122.0  | (2)  | C25—C26—C27 | 121.9  | (2)  |
| C1—C2—C3    | 121.8  | (2)  | C25—C26—N28 | 105.4  | (2)  |
| C2—C3—C4    | 116.8  | (2)  | C27—C26—N28 | 132.7  | (2)  |
| C3—C4—C5    | 121.1  | (2)  | C22—C27—C26 | 117.0  | (2)  |
| C3—C4—N7    | 132.6  | (2)  | C26—N28—C30 | 109.47 | (19) |
| C5—C4—N7    | 106.2  | (2)  | C25—N29—C30 | 109.3  | (2)  |
| C4—C5—C6    | 122.2  | (2)  | N29—C30—N28 | 109.1  | (2)  |
| C4—C5—N8    | 106.8  | (2)  | N29—C30—C31 | 122.7  | (2)  |
| C6—C5—N8    | 131.0  | (2)  | N28—C30—C31 | 128.2  | (2)  |
| C5—C6—C1    | 116.1  | (2)  | C30—C31—C32 | 115.93 | (19) |
| C4—N7—C9    | 108.51 | (18) | C31—C32—C33 | 112.91 | (18) |
| C5—N8—C9    | 108.47 | (19) | C32—C33—C34 | 112.11 | (18) |
| N8—C9—N7    | 110.0  | (2)  | C33—C34—N35 | 122.51 | (19) |
| N8—C9—C10   | 125.79 | (19) | C33—C34—N36 | 127.1  | (2)  |
| N7—C9—C10   | 124.2  | (2)  | N35—C34—N36 | 110.33 | (19) |
| C9—C10—C11  | 111.36 | (18) | C34—N35—C38 | 108.90 | (18) |
| C10—C11—C12 | 112.39 | (18) | C34—N36—C37 | 108.20 | (19) |
| C11—C12—C13 | 110.73 | (17) | N36—C37—C38 | 106.36 | (19) |
| C12—C13—N14 | 125.0  | (2)  | N36—C37—C42 | 132.3  | (2)  |
| C12—C13—N15 | 125.6  | (2)  | C38—C37—C42 | 121.3  | (2)  |
| N14—C13—N15 | 109.3  | (2)  | C37—C38—N35 | 106.2  | (2)  |
| C13—N14—C17 | 108.85 | (19) | C37—C38—C39 | 121.8  | (2)  |
| C13—N15—C16 | 108.7  | (2)  | N35—C38—C39 | 132.0  | (2)  |
| N15—C16—C17 | 106.36 | (19) | C38—C39—C40 | 116.7  | (2)  |
| N15—C16—C21 | 132.0  | (2)  | C39—C40—C41 | 121.7  | (2)  |
| C17—C16—C21 | 121.6  | (2)  | C40—C41—C42 | 122.0  | (2)  |
| N14—C17—C16 | 106.7  | (2)  | C37—C42—C41 | 116.5  | (2)  |

|             |       |     |             |        |      |
|-------------|-------|-----|-------------|--------|------|
| N14—C17—C18 | 130.7 | (2) | O44—S43—O45 | 107.80 | (10) |
| C16—C17—C18 | 122.5 | (2) | O44—S43—O46 | 108.37 | (10) |
| C17—C18—C19 | 115.7 | (2) | O45—S43—O46 | 110.01 | (11) |
| C18—C19—C20 | 121.5 | (2) | O44—S43—O47 | 109.45 | (11) |
| C19—C20—C21 | 122.5 | (2) | O45—S43—O47 | 110.25 | (10) |
| C16—C21—C20 | 116.1 | (2) | O46—S43—O47 | 110.89 | (10) |
| C23—C22—C27 | 121.3 | (2) | O49—S48—O50 | 109.18 | (11) |
| C22—C23—C24 | 122.1 | (2) | O49—S48—O51 | 108.80 | (11) |
| C23—C24—C25 | 116.2 | (2) | O50—S48—O51 | 109.29 | (10) |
| C24—C25—C26 | 121.5 | (2) | O49—S48—O52 | 107.73 | (10) |
| C24—C25—N29 | 131.7 | (2) | O50—S48—O52 | 110.67 | (11) |
| C26—C25—N29 | 106.8 | (2) | O51—S48—O52 | 111.13 | (11) |

Table S9. Data for hydrogen bonds for [2]SO<sub>4</sub>.3H<sub>2</sub>O

|                   | <i>D</i> —H | H... <i>A</i> | <i>D</i> ... <i>A</i> |     | <i>D</i> —H... <i>A</i> |
|-------------------|-------------|---------------|-----------------------|-----|-------------------------|
| N14—H141...O45iii | 0.84        | 1.95          | 2.775                 | (3) | 166                     |
| N15—H151...O59vi  | 0.91        | 1.85          | 2.686                 | (3) | 152                     |
| N8—H81...O44iii   | 0.83        | 1.87          | 2.685                 | (3) | 167                     |
| C3—H31...O46vii   | 0.95        | 2.59          | 3.399                 | (3) | 143                     |
| C2—H21...O44vii   | 0.95        | 2.60          | 3.342                 | (3) | 135                     |
| N7—H71...O52viii  | 0.89        | 1.79          | 2.676                 | (3) | 175                     |
| N35—H351...O49    | 0.89        | 1.80          | 2.644                 | (3) | 159                     |
| N36—H361...O46ii  | 0.91        | 1.91          | 2.676                 | (3) | 141                     |
| N28—H281...O49    | 0.97        | 1.78          | 2.743                 | (3) | 173                     |
| C27—H271...O52    | 0.95        | 2.51          | 3.303                 | (3) | 141                     |
| N29—H291...O53    | 0.79        | 1.93          | 2.665                 | (3) | 156                     |
| O53—H532...O51iii | 0.96        | 1.81          | 2.723                 | (3) | 159                     |
| O54—H542...O47ii  | 0.96        | 1.96          | 2.921                 | (6) | 176                     |
| O54—H551...O47ii  | 1.22        | 1.92          | 2.921                 | (6) | 136                     |
| O56—H561...O47iv  | 0.96        | 2.15          | 2.993                 | (3) | 147                     |
| O57—H571...O56    | 0.96        | 1.82          | 2.752                 | (3) | 164                     |
| O57—H572...O51iii | 0.96        | 1.89          | 2.825                 | (3) | 164                     |
| O58—H581...O57vi  | 0.96        | 1.83          | 2.791                 | (3) | 178                     |
| O58—H582...O50iii | 0.96        | 1.84          | 2.796                 | (3) | 177                     |
| O59—H592...O45    | 0.96        | 1.84          | 2.790                 | (3) | 168                     |

Symmetry codes: (i)  $x-1, y, z$ ; (ii)  $x+1/2, -y+1, z-1/2$ ; (iii)  $x-1/2, -y+1, z+1/2$ ; (iv)  $x+1/2, -y+1, z+1/2$ ; (v)  $x+1, y, z$ ; (vi)  $x-1, y-1, z$ ; (vii)  $x, y-1, z+1$ ; (viii)  $x-1, y-1, z+1$ .  
 $-1/2+x, 1-y, 1/2+z$

Figure S3 Ortep drawing of  $(4)_2(\text{H}_2\text{PO}_4)_2(\text{HPO}_4)\cdot 4\text{H}_2\text{O}$ , ellipsoids at 50%

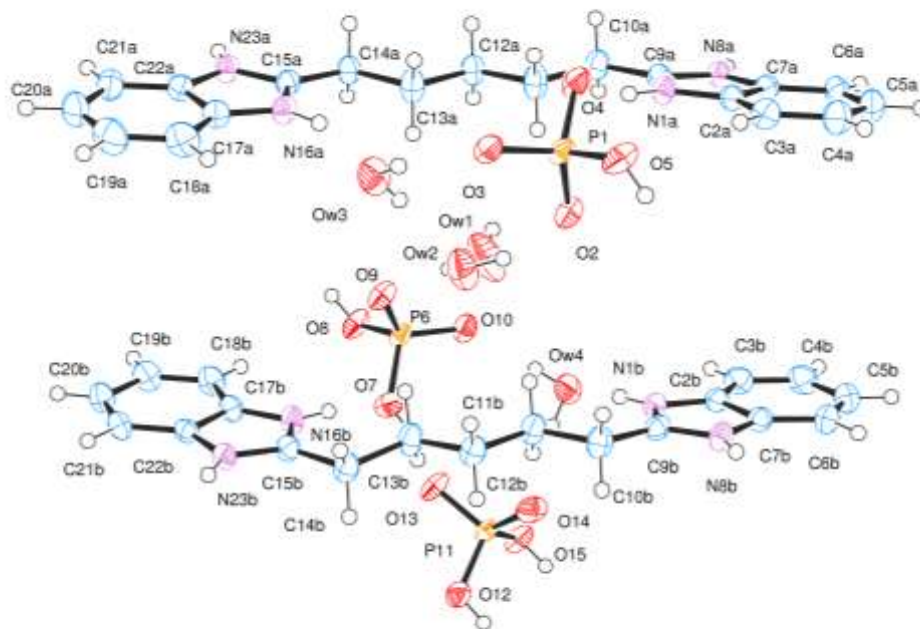

Table S10 Geometric parameters (Å, °) for  $(4)_2(\text{H}_2\text{PO}_4)_2(\text{HPO}_4)\cdot 4\text{H}_2\text{O}$

|           |        |      |           |       |     |
|-----------|--------|------|-----------|-------|-----|
| P1—O2     | 1.5140 | (12) | N16A—C17A | 1.386 | (2) |
| P1—O3     | 1.5306 | (11) | N16A—C15A | 1.332 | (2) |
| P1—O5     | 1.5776 | (12) | C13A—C14A | 1.517 | (2) |
| P1—O4     | 1.5255 | (11) | C13A—C12A | 1.521 | (2) |
| P6—O8     | 1.5588 | (12) | N8A—C7A   | 1.388 | (2) |
| P6—O10    | 1.4999 | (12) | N8A—C9A   | 1.332 | (2) |
| P6—O7     | 1.5775 | (12) | C18B—C19B | 1.378 | (3) |
| P6—O9     | 1.5066 | (12) | C18B—C17B | 1.389 | (2) |
| P11—O12   | 1.5680 | (12) | C17A—C22A | 1.393 | (2) |
| P11—O14   | 1.5058 | (12) | C17A—C18A | 1.388 | (2) |
| P11—O15   | 1.5562 | (12) | C3B—C2B   | 1.385 | (2) |
| P11—O13   | 1.5123 | (11) | C3B—C4B   | 1.378 | (3) |
| N8B—C7B   | 1.384  | (2)  | C3A—C4A   | 1.377 | (2) |
| N8B—C9B   | 1.334  | (2)  | C14A—C15A | 1.488 | (2) |
| N23B—C15B | 1.329  | (2)  | N16B—C15B | 1.329 | (2) |
| N23B—C22B | 1.390  | (2)  | N16B—C17B | 1.386 | (2) |
| N23A—C22A | 1.385  | (2)  | C13B—C14B | 1.526 | (2) |
| N23A—C15A | 1.334  | (2)  | C13B—C12B | 1.521 | (2) |
| C7B—C2B   | 1.393  | (2)  | C2B—N1B   | 1.388 | (2) |
| C7B—C6B   | 1.389  | (2)  | C6B—C5B   | 1.384 | (3) |
| C21A—C22A | 1.389  | (2)  | N1B—C9B   | 1.332 | (2) |



|                |        |      |                |        |      |
|----------------|--------|------|----------------|--------|------|
| C21A—C20A      | 1.381  | (3)  | C4B—C5B        | 1.397  | (3)  |
| C2A—N1A        | 1.387  | (2)  | C11A—C10A      | 1.514  | (2)  |
| C2A—C7A        | 1.396  | (2)  | C11A—C12A      | 1.519  | (2)  |
| C2A—C3A        | 1.390  | (2)  | C4A—C5A        | 1.401  | (3)  |
| N1A—C9A        | 1.329  | (2)  | C20A—C19A      | 1.395  | (3)  |
| C20B—C19B      | 1.402  | (3)  | C11B—C12B      | 1.522  | (2)  |
| C20B—C21B      | 1.384  | (2)  | C21B—C22B      | 1.393  | (2)  |
| C10B—C11B      | 1.520  | (2)  | C10A—C9A       | 1.491  | (2)  |
| C10B—C9B       | 1.486  | (2)  | C14B—C15B      | 1.491  | (2)  |
| C6A—C7A        | 1.396  | (2)  | C19A—C18A      | 1.377  | (3)  |
| C6A—C5A        | 1.384  | (2)  | C17B—C22B      | 1.397  | (2)  |
| O2—P1—O3       | 112.35 | (7)  | C18B—C19B—C20B | 121.63 | (16) |
| O2—P1—O5       | 108.64 | (6)  | N23A—C22A—C21A | 131.87 | (16) |
| O2—P1—O4       | 111.76 | (7)  | N23A—C22A—C17A | 106.53 | (14) |
| O3—P1—O5       | 106.31 | (7)  | C21A—C22A—C17A | 121.59 | (16) |
| O4—P1—O3       | 110.32 | (6)  | C15A—C14A—C13A | 113.70 | (13) |
| O4—P1—O5       | 107.17 | (8)  | C15B—N16B—C17B | 109.48 | (13) |
| O8—P6—O7       | 106.01 | (8)  | C12B—C13B—C14B | 114.40 | (14) |
| O10—P6—O8      | 108.76 | (7)  | C3B—C2B—C7B    | 121.87 | (16) |
| O10—P6—O7      | 109.59 | (7)  | C3B—C2B—N1B    | 131.59 | (15) |
| O10—P6—O9      | 116.40 | (8)  | N1B—C2B—C7B    | 106.53 | (14) |
| O9—P6—O8       | 110.53 | (6)  | C5B—C6B—C7B    | 116.37 | (16) |
| O9—P6—O7       | 105.02 | (7)  | C9B—N1B—C2B    | 108.62 | (13) |
| O14—P11—O12    | 108.63 | (7)  | C3B—C4B—C5B    | 121.77 | (17) |
| O14—P11—O15    | 111.15 | (8)  | C10A—C11A—C12A | 114.66 | (14) |
| O14—P11—O13    | 114.37 | (7)  | C3A—C4A—C5A    | 121.65 | (16) |
| O15—P11—O12    | 108.00 | (7)  | C21A—C20A—C19A | 121.54 | (18) |
| O13—P11—O12    | 107.94 | (7)  | C10B—C11B—C12B | 113.19 | (14) |
| O13—P11—O15    | 106.54 | (6)  | C20B—C21B—C22B | 116.69 | (15) |
| C9B—N8B—C7B    | 108.90 | (13) | C9A—C10A—C11A  | 112.76 | (13) |
| C15B—N23B—C22B | 109.08 | (13) | C15B—C14B—C13B | 111.92 | (13) |
| C15A—N23A—C22A | 108.65 | (13) | C18A—C19A—C20A | 122.20 | (18) |
| N8B—C7B—C2B    | 106.37 | (14) | C6A—C5A—C4A    | 122.18 | (16) |
| N8B—C7B—C6B    | 132.06 | (15) | C13B—C12B—C11B | 109.81 | (14) |
| C6B—C7B—C2B    | 121.58 | (16) | N8B—C9B—C10B   | 123.73 | (14) |
| C20A—C21A—C22A | 116.55 | (17) | N1B—C9B—N8B    | 109.58 | (14) |
| N1A—C2A—C7A    | 106.48 | (13) | N1B—C9B—C10B   | 126.68 | (14) |
| N1A—C2A—C3A    | 131.18 | (14) | C11A—C12A—C13A | 110.22 | (13) |
| C3A—C2A—C7A    | 122.34 | (14) | C6B—C5B—C4B    | 121.81 | (17) |
| C9A—N1A—C2A    | 108.80 | (13) | N1A—C9A—N8A    | 109.70 | (14) |
| C21B—C20B—C19B | 121.92 | (16) | N1A—C9A—C10A   | 125.46 | (14) |
| C9B—C10B—C11B  | 114.06 | (14) | N8A—C9A—C10A   | 124.83 | (14) |
| C5A—C6A—C7A    | 116.35 | (15) | C19A—C18A—C17A | 116.36 | (18) |
| C15A—N16A—C17A | 108.71 | (13) | N23B—C15B—N16B | 109.24 | (14) |
| C14A—C13A—C12A | 113.80 | (14) | N23B—C15B—C14B | 125.78 | (14) |
| C9A—N8A—C7A    | 108.84 | (13) | N16B—C15B—C14B | 124.97 | (14) |
| C19B—C18B—C17B | 116.51 | (15) | N23A—C15A—C14A | 124.23 | (14) |
| C6A—C7A—C2A    | 121.08 | (15) | N16A—C15A—N23A | 109.65 | (14) |
| N8A—C7A—C2A    | 106.18 | (13) | N16A—C15A—C14A | 126.11 | (14) |
| N8A—C7A—C6A    | 132.73 | (15) | C18B—C17B—C22B | 122.31 | (15) |
| N16A—C17A—C22A | 106.44 | (14) | N16B—C17B—C18B | 131.75 | (15) |
| N16A—C17A—C18A | 131.80 | (16) | N16B—C17B—C22B | 105.93 | (14) |
| C18A—C17A—C22A | 121.76 | (16) | N23B—C22B—C21B | 132.79 | (14) |
| C4B—C3B—C2B    | 116.60 | (16) | N23B—C22B—C17B | 106.26 | (13) |
| C4A—C3A—C2A    | 116.39 | (15) | C21B—C22B—C17B | 120.94 | (15) |



Table S11 Hydrogen-bond geometry (Å, °) for (4)<sub>2</sub>(H<sub>2</sub>PO<sub>4</sub>)<sub>2</sub>(HPO<sub>4</sub>).4H<sub>2</sub>O

| <i>D</i> —H... <i>A</i>            | <i>D</i> —H | H... <i>A</i> | <i>D</i> ... <i>A</i> |      | <i>D</i> —H... <i>A</i> |
|------------------------------------|-------------|---------------|-----------------------|------|-------------------------|
| O8—H8...O2i                        | 0.84        | 1.67          | 2.4867                | (16) | 164                     |
| O12—H12...O3ii                     | 0.84        | 1.72          | 2.5502                | (16) | 170                     |
| O15—H15...O4ii                     | 0.84        | 1.67          | 2.5118                | (16) | 174                     |
| O5—H5...O9iii                      | 0.84        | 1.72          | 2.5483                | (16) | 167                     |
| O7—H7...O13                        | 0.84        | 1.70          | 2.5316                | (16) | 168                     |
| N8 <i>B</i> —H8 <i>B</i> ...O13iii | 0.88        | 1.77          | 2.6451                | (17) | 172                     |
| N23 <i>B</i> —H23 <i>B</i> ...O3iv | 0.88        | 1.84          | 2.6916                | (17) | 164                     |
| N23 <i>A</i> —H23 <i>A</i> ...O14v | 0.88        | 1.73          | 2.6000                | (17) | 169                     |
| N1 <i>A</i> —H1 <i>A</i> ...O4     | 0.88        | 1.82          | 2.6587                | (17) | 159                     |
| N16 <i>A</i> —H16 <i>A</i> ...OW3  | 0.88        | 1.86          | 2.7048                | (18) | 160                     |
| N8 <i>A</i> —H8 <i>A</i> ...O10vi  | 0.88        | 1.80          | 2.6662                | (17) | 167                     |
| N16 <i>B</i> —H16 <i>B</i> ...O7   | 0.88        | 1.92          | 2.7670                | (17) | 161                     |
| N1 <i>B</i> —H1 <i>B</i> ...OW4    | 0.88        | 1.83          | 2.6641                | (17) | 159                     |
| OW4—HW4 <i>A</i> ...O14            | 0.87        | 1.86          | 2.7127                | (19) | 168                     |
| OW4—HW4 <i>B</i> ...O10            | 0.87        | 1.86          | 2.7314                | (17) | 178                     |
| OW3—HW3 <i>A</i> ...O3             | 0.87        | 2.06          | 2.8804                | (18) | 158                     |
| OW3—HW3 <i>B</i> ...OW2            | 0.87        | 1.97          | 2.795                 | (2)  | 159                     |
| OW1—HW1 <i>A</i> ...O9             | 0.86        | 1.88          | 2.693                 | (2)  | 157                     |
| OW2—HW2 <i>A</i> ...O2             | 0.85        | 1.96          | 2.7363                | (19) | 153                     |
| OW2—HW2 <i>B</i> ...OW1            | 0.85        | 2.09          | 2.832                 | (3)  | 145                     |

Symmetry codes: (i)  $x+1, y, z$ ; (ii)  $x+1, y+1, z$ ; (iii)  $x-1, y, z$ ; (iv)  $-x+1, -y+1, -z+2$ ; (v)  $x, y-1, z$ ; (vi)  $-x+1, -y+1, -z+1$ .
